# Supplementary material
Source: HighWire-hosted journal article supplement (doi:10.1101/rna.080698.125)
Supplement: Supplemental_Figure_Legends.docx [file Supplemental_Figure_Legends.docx]

# **Supplementary Figure Legends**

#### **Supplementary Figure 1.**

**Quality check of HPV18-mapped reads using direct RNA-sequencing.** (**A**) IGV screenshot illustrating the presence of softclipped (multi-coloured) regions in reads, derived from the human genome. (**B**) Average base quality per position for each of the HPV and IVT samples across the HPV18 reference genome. Zero quality indicates lack of coverage in these regions.

#### **Supplementary Figure 2.**

**Properties of m6A sites identified by Dorado in the WT and IVT samples.**
(**A**) Venn diagram showing overlap between WT and IVT samples for Dorado-identified sites. (**B**) Distribution of sites per molecule for the 25 WT-derived sites, shown for the WT and IVT samples. (**C**) xPore results comparing WT and IVT samples. Each point represents a genomic position, plotted by xPore’s inferred modification-rate difference (WT–IVT, absolute value) versus -log10(adjusted p-value). Points are coloured by xPore significance (purple for FDR < 0.05, grey for not significant). Red circles denote positions corresponding to Dorado m6A candidates (large red circles for exact nucleotide matches; small red circles for positions within ±2 nt of a Dorado-called site). (**D**) Distribution of xPore sites overlapping sets of 25 randomly selected positions. The arrow represents the true overlap between the xPore significant sites and the Dorado-identified sites (±2 bp). (**E-F**) f5c eventalign signal plots for WT (red) and IVT (blue) reads around two Dorado-identified m6A candidate sites, with the xPore-identified positions indicated by black arrows: (**E**) position 277 and (**F**) position 551, including 3 bp upstream and downstream of the site of interest. Thick dotted horizontal lines show the mean signal level for the IVT sample, providing a reference reflecting the IVT baseline.

#### **Supplementary Figure 3.**

**GLORI quality control analyses.**
(**A**) Coverage of GLORI reads across the HPV18 genome, based on wild-type control samples for the knockdown, inhibition and hypoxia experiments. (**B**) Proportions of A-to-G conversions in untreated GLORI (GLORI-) samples for the knockdown, inhibition and hypoxia experiments, for each of the 25 candidate m6A sites identified by Dorado. (**C**) Scatter plot comparing estimated modification rates from nanopore direct RNA sequencing and GLORI for the 21 m6A sites identified only in the WT sample.

#### **Supplementary Figure 4.**

**GLORI analysis of methylation changes based on knockdown, inhibition or hypoxia experiments.**
(**A**) Heatmap showing significance of writer component knockdown or inhibition versus controls (siwriterControl) or of YTHDF2 knockdown versus controls (siYTHDF2control). Adjusted p-values from the binomial generalised linear model were converted into -log10(.) prior to plotting the heatmap. Coloured bar at the top represents the three groups indicated to the left of the plot. (**B**) Extended eTAM figure for DRS-defined sites, including the adenosine ratios detected in the IVT samples. (**C**) Analysis of hypoxia samples. Bars represent proportion of protected As from treated GLORI samples, and p-values represent significance of hypoxia treatment based on a binomial generalised linear model.

#### **Supplementary Figure 5.**

**Extended IGV view of E6-intron spliced and unspliced reads.**
(**A**) IGV view including spliced and unspliced reads from the WT sample. Blue marks represent Dorado m6A calls (dark for present and light for absence of modification). The number of reads considered in each class is indicated on the left. (**B**) As in (**A**), but for the IVT sample.

#### **Supplementary Figure 6.**

**Additional analyses of E6 intron splicing based on eTAM-seq and GLORI datasets.**
**(A**) Linkage analysis for the m6A site at position 455 in the staged 4sU-GLORI dataset and the GLORI HeLa hypoxia control sample. (**B**) As in (**A**), but based on eTAM-seq data. (**C**) E6 intron retention (unspliced / informative reads) in eTAM-seq data. Dots represent values for individual replicates, and n values indicate numbers of informative reads. (**D**) Splicing index of the E6 intron (spliced / informative reads) in the staged 4sU-GLORI dataset. (**E**) As in (**C**), but for the GLORI writer-perturbation dataset.

#### **Supplementary Figure 7.**

**Analysis of differential methylation according to presence of E1 or use of transcription initiation site.**
(**A**) WT and IVT reads from direct RNA-sequencing split according to E1 presence, plotted is the modification percentage inferred by modkit. (**B**) as (**A**) but reads for SV2 and SV4 are compared. All positions were tested using a Fisher’s exact test (based on counts yes/no versus modified/unmodified reads) and none were significant after multiple testing adjustments.

#### **Supplementary Figure 8.**

**Analysis of m5C and Pseudouridine.**
(**A**) Coverage of m5C-TAC-seq reads in chemically treated samples at the 8 candidate positions which were detected in the WT direct RNA-sequencing sample but not the IVT (**B**) Venn diagram depicting overlap between WT and IVT pseudouridine sites identified by Dorado (**C**) Modification percentage scatter plot for pseudouridine comparing WT and IVT samples.
